# Supplementary material for: Experimental and Computational Analysis of Synthesis Conditions of Hybrid Nanoflowers for Lipase Immobilization
Source: MDPI journal article supplement (doi:10.3390/molecules29030628), 2024-01-29
Supplement: s1 [file s1]

**Figure S1.** Molecular interaction diagrams of BCL with Cu<sup>2+</sup> at bind poses with all docking score values.

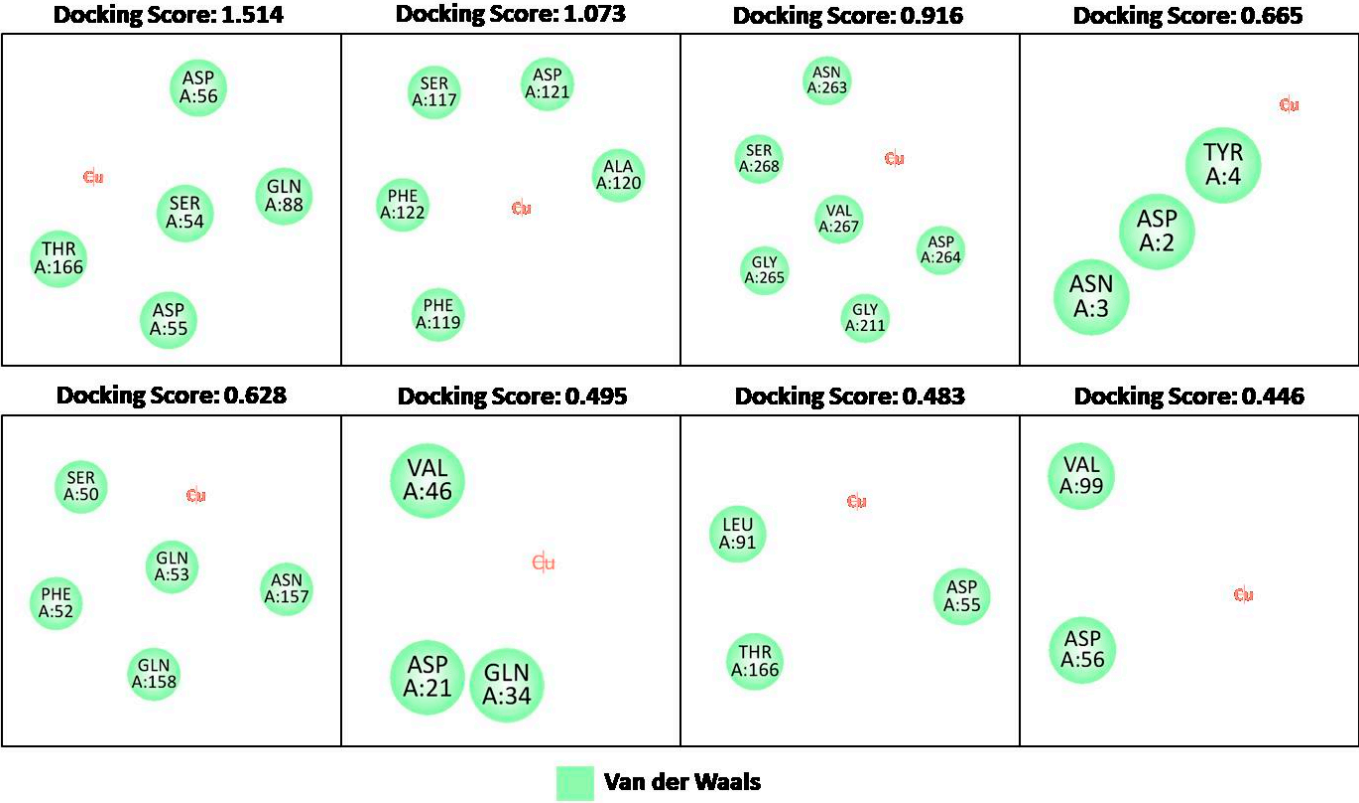

**Table S1.** Interacting amino acids predicted by MIB for BCL – Cu<sup>2+</sup> complex.

| Docking Score | Amino Acid | Type of interaction |
|---------------|------------|---------------------|
| 1.514         | ASP55      | Van der Waals       |
|               | ASP56      |                     |
|               | GLN88      |                     |
|               | SER54      |                     |
|               | THR166     |                     |
| 1.073         | ALA120     | Van der Waals       |
|               | ASP121     |                     |
|               | SER117     |                     |
|               | PHE122     |                     |
|               | PHE119     |                     |
| 0.916         | ASN263     | Van der Waals       |
|               | SER268     |                     |
|               | VAL267     |                     |
|               | ASP264     |                     |
|               | GLY265     |                     |
|               | GLY211     |                     |
| 0.665         | TYR4       | Van der Waals       |
|               | ASP2       |                     |
|               | ASN3       |                     |
| 0.628         | SER50      | Van der Waals       |
|               | PHE52      |                     |
|               | GLN53      |                     |
|               | ASN157     |                     |
|               | GLN158     |                     |
| 0.495         | VAL46      | Van der Waals       |
|               | ASP21      |                     |
|               | GLN34      |                     |
| 0.483         | LEU91      | Van der Waals       |
|               | THR166     |                     |
|               | ASP55      |                     |
| 0.446         | VAL99      | Van der Waals       |
|               | ASP56      |                     |
| 0.405         | -          | -                   |
